# Supplementary material for: A pan-cancer analysis of the oncogenic role of ribonucleotide reductase subunit M2 in human tumors
Source: PeerJ. 2022 Nov 28;10:e14432. doi: 10.7717/peerj.14432 (PMC9744174; doi:10.7717/peerj.14432)
Supplement: Supplemental Information 1 [file peerj-10-14432-s001.xlsx]

## Sheet: Huh-7
	group	RRM2	GAPDH	average of actin	ΔC(β-actin)	ΔΔCt	average	Normalized	%
	CK	17.781	16.786	16.821	0.96	0.514057
	CK	17.711	16.904		0.89	0.539614
	CK	17.669	16.773		0.848	0.555554	0.536408	1	100
	NC	17.537	16.928	16.9047	0.632333	0.645132
	NC	17.468	16.954		0.563333	0.676737
	NC	17.548	16.832		0.643333	0.640232	0.654034	1.21928	121.928
	siRNA-1	23.147	16.944	16.8593	6.28767	0.0128004
	siRNA-1	23.285	16.854		6.42567	0.0116327
	siRNA-1	23.097	16.78		6.23767	0.0132518	0.0125616	0.0234181	2.34181
	siRNA-2	21.187	16.869	16.8473	4.33967	0.049389
	siRNA-2	21.27	16.858		4.42267	0.0466278
	siRNA-2	21.209	16.815		4.36167	0.0486416	0.0482194	0.0898931	8.98931
	siRNA-3	19.744	16.862	16.848	2.896	0.134344
	siRNA-3	19.685	16.845		2.837	0.139952
	siRNA-3	19.595	16.837		2.747	0.14896	0.141085	0.263018	26.3018
	group	RRM2	GAPDH	average of actin	ΔC(β-actin)	ΔΔCt	average	Normalized	%
	CK	16.971	15.666	15.541	1.43	0.371131
	CK	17.07	15.476		1.529	0.346517
	CK	17.108	15.481		1.567	0.337509	0.351719	1	100
	NC	17.053	15.478	15.487	1.566	0.337744
	NC	17.044	15.509		1.557	0.339857
	NC	17.104	15.474		1.617	0.326013	0.334538	0.95115	95.115
	siRNA-1	22.6	15.538	15.522	7.078	0.00740133
	siRNA-1	22.702	15.532		7.18	0.00689612
	siRNA-1	22.714	15.496		7.192	0.00683899	0.00704548	0.0200315	2.00315
	siRNA-2	20.712	15.527	15.5257	5.18633	0.0274636
	siRNA-2	20.758	15.555		5.23233	0.0266018
	siRNA-2	20.77	15.495		5.24433	0.0263814	0.0268156	0.0762415	7.62415
	siRNA-3	20.067	15.513	15.5047	4.56233	0.0423254
	siRNA-3	20.51	15.483		5.00533	0.0311347
	siRNA-3	20.438	15.518		4.93333	0.0327279	0.035396	0.100637	10.0637
	group	RRM2	GAPDH	average of actin	ΔC(β-actin)	ΔΔCt	average	Normalized	%
	CK	17.609	15.931	15.8827	1.72633	0.302219
	CK	17.659	15.788		1.77633	0.291924
	CK	17.721	15.929		1.83833	0.279645	0.291263	1	100
	NC	17.583	15.761	15.728	1.855	0.276433
	NC	17.613	15.693		1.885	0.270744
	NC	17.608	15.73		1.88	0.271684	0.272953	0.937138	93.7138
	siRNA-1	23.244	15.798	15.8003	7.44367	0.00574425
	siRNA-1	23.34	15.742		7.53967	0.00537445
	siRNA-1	23.366	15.861		7.56567	0.00527846	0.00546572	0.0187656	1.87656
	siRNA-2	21.523	15.757	15.797	5.726	0.0188931
	siRNA-2	21.413	15.794		5.616	0.0203899
	siRNA-2	21.396	15.84		5.599	0.0206316	0.0199715	0.0685688	6.85688
	siRNA-3	20.989	15.78	15.7927	5.19633	0.0272739
	siRNA-3	20.953	15.822		5.16033	0.0279631
	siRNA-3	20.935	15.776		5.14233	0.0283141	0.0278504	0.0956195	9.56195

## Sheet: HepG2
group	RRM2	GAPDH	average of actin	ΔC(β-actin)	ΔΔCt	average	Normalized	%
CK	18.131	17.869	17.858	0.273	0.827597
CK	18.034	17.962		0.176	0.885154
CK	18.028	17.743		0.17	0.888843	0.867198	1	100
NC	17.967	17.868	17.851	0.116	0.922742
NC	17.975	17.925		0.124	0.91764
NC	18.001	17.76		0.15	0.90125	0.913878	1.05383	105.383
siRNA-1	19.564	17.797	17.775	1.789	0.289373
siRNA-1	19.629	17.84		1.854	0.276624
siRNA-1	19.568	17.688		1.793	0.288571	0.284856	0.328479	32.8479
siRNA-2	21.058	17.785	17.803	3.255	0.104748
siRNA-2	21.105	17.814		3.302	0.101391
siRNA-2	21.067	17.81		3.264	0.104097	0.103412	0.119249	11.9249
siRNA-3	19.551	17.821	17.806	1.745	0.298334
siRNA-3	19.718	17.81		1.912	0.265724
siRNA-3	19.731	17.787		1.925	0.26334	0.275799	0.318035	31.8035
group	RRM2	GAPDH	average of actin	ΔC(β-actin)	ΔΔCt	average	Normalized	%
CK	20.83	16.937	16.866	3.964	0.0640792
CK	20.885	16.82		4.019	0.0616823
CK	21.141	16.841		4.275	0.0516531	0.0591382	1	100
NC	20.88	16.844	16.858	4.022	0.0615542
NC	21.037	16.935		4.179	0.0552072
NC	21.102	16.795		4.244	0.0527751	0.0565121	0.955594	95.5594
siRNA-1	22.683	16.846	16.8423	5.84067	0.0174495
siRNA-1	22.778	16.851		5.93567	0.0163375
siRNA-1	22.757	16.83		5.91467	0.0165771	0.016788	0.283878	28.3878
siRNA-2	25.55	16.85	16.7843	8.76567	0.00229758
siRNA-2	25.615	16.79		8.83067	0.00219636
siRNA-2	25.759	16.713		8.97467	0.00198772	0.00216056	0.036534	3.6534
siRNA-3	22.779	16.854	16.8377	5.94133	0.0162735
siRNA-3	22.621	16.78		5.78333	0.018157
siRNA-3	22.561	16.879		5.72333	0.018928	0.0177862	0.300756	30.0756
group	RRM2	GAPDH	average of actin	ΔC(β-actin)	ΔΔCt	average	Normalized	%
CK	21.22	12.876	12.7553	8.46467	0.00283062
CK	21.298	12.945		8.54267	0.00268164
CK	21.242	12.445		8.48667	0.00278778	0.00276668	1	100
NC	20.09	11.931	11.929	8.161	0.00349377
NC	20.99	11.913		9.061	0.00187226
NC	20.702	11.943		8.773	0.00228593	0.00255066	0.921919	92.1919
siRNA-1	21.242	11.902	12.4073	8.83467	0.00219028
siRNA-1	21.397	12.405		8.98967	0.00196716
siRNA-1	21.407	12.915		8.99967	0.00195358	0.00203701	0.736264	73.6264
siRNA-2	21.518	11.951	11.932	9.586	0.00130115
siRNA-2	21.246	11.939		9.314	0.00157111
siRNA-2	21.242	11.906		9.31	0.00157547	0.00148258	0.535868	53.5868
siRNA-3	21.413	12.975	12.4367	8.97633	0.00198543
siRNA-3	21.3	12.261		8.86333	0.00214719
siRNA-3	21.325	12.074		8.88833	0.0021103	0.00208098	0.752156	75.2156
