# Supplementary material for: A pan-cancer analysis of the oncogenic role of ribonucleotide reductase subunit M2 in human tumors
Source: PeerJ. 2022 Nov 28;10:e14432. doi: 10.7717/peerj.14432 (PMC9744174; doi:10.7717/peerj.14432)
Supplement: Supplemental Information 2 [file peerj-10-14432-s002.xlsx]

## Sheet: Sheet1
Huh7						HepG2
		CK	NC	siRNA1				CK	NC	siRNA1
	repeat1	0.8372	0.8928	0.3273			repeat1	0.9213	0.9153	0.2043
	repeat2	0.9192	0.9917	0.4294			repeat2	0.9376	0.9322	0.2535
	repeat3	0.9283	0.9235	0.3318			repeat3	0.8835	0.8936	0.2416
