# Supplementary material for: A pan-cancer analysis of the oncogenic role of ribonucleotide reductase subunit M2 in human tumors
Source: PeerJ. 2022 Nov 28;10:e14432. doi: 10.7717/peerj.14432 (PMC9744174; doi:10.7717/peerj.14432)
Supplement: Supplemental Information 4 [file peerj-10-14432-s004.xlsx]

## Sheet: Sheet2
1	group	HBx	actin	average of actin	ΔC(β-actin)	ΔΔCt	average	Normalized	%
	LO2-5	40	12.56	12.6167	27.3833	5.71209e-09
	LO2-5	40	12.61		27.3833	5.71209e-09
	LO2-5	40	12.68		27.3833	5.71209e-09	5.71209e-09	1	100
	LO2+2	21.57	13.53	13.3933	8.17667	0.00345603
	LO2+2	21.5	13.35		8.10667	0.00362786
	LO2+2	21.58	13.3		8.18667	0.00343216	0.00350535	613672	6.13672e+07
2	group	HBx	actin	average of actin	ΔC(β-actin)	ΔΔCt	average	Normalized	%
	huh-7	40	15.02	15.69	24.31	4.80796e-08
	huh-8	40	15.93		24.31	4.80796e-08
	huh-9	40	16.12		24.31	4.80796e-08	4.80796e-08	1	100
	huh-10	19.94	14.91	15.1367	4.80333	0.035814					LO2	vector	HBx
	huh-12	20.22	15.23		5.08333	0.0294961					1	0.00350535	613672		0.00350535	613672
	huh-13	20.32	15.27		5.18333	0.0275208	0.0309436	643592	6.43592e+07		2	0.0309436	643592		0.0309436	643592
											3	0.0132105	937094		0.0132105	937094
3	group	HBx	actin	average of actin	ΔC(β-actin)	ΔΔCt	average	Normalized	%		average	0.0158865	731452		0.0158865
	huh-8	40	13.94	13.92	26.08	1.40974e-08						1	4.60424e+07
	huh-8	40	13.79		26.08	1.40974e-08									0.22065	3.86285e+07
	huh-8	40	14.03		26.08	1.40974e-08	1.40974e-08	1	100						1.94779	4.05118e+07
	huh-12	18.27	12.68	11.84	6.43	0.0115978									0.831558	5.89868e+07
	huh-12	17.85	12.62		6.01	0.0155171
	huh-12	18.16	10.22		6.32	0.0125167	0.0132105	937094	9.37094e+07
