# Supplementary material for: A pan-cancer analysis of the oncogenic role of ribonucleotide reductase subunit M2 in human tumors
Source: PeerJ. 2022 Nov 28;10:e14432. doi: 10.7717/peerj.14432 (PMC9744174; doi:10.7717/peerj.14432)
Supplement: Supplemental Information 5 [file peerj-10-14432-s005.xlsx]

## Sheet: Sheet2
1	group	RRM2	actin	average of actin	ΔC(β-actin)	ΔΔCt	average	Normalized	%		LO2	vector	RRM2
	LO2-9	19.12	13.02	12.94	6.18	0.0137922					1	0.0299137	1.73355		0.0299137	1.73355
	LO2-7	18.85	13.2		5.91	0.0166308					2	0.0299512	1.66769		0.0299512	1.66769
	LO2-8	18.49	12.6		5.55	0.0213444	0.0172558	1	100		3	0.00732724	1.99942		0.00732724	1.99942
	LO2+1	18.62	13.27	13.4633	5.15667	0.0280342
	LO2+2	18.17	13.03		4.70667	0.0382959					average	0.0223974	1.80022		0.0223974
	LO2+3	18.88	14.09		5.41667	0.023411	0.0299137	1.73355	173.355			1	80.3763
															1.33559	77.3995
															1.33726	74.459
															0.327147	89.2704
2	group	RRM2	actin	average of actin	ΔC(β-actin)	ΔΔCt	average	Normalized	%
	LO2-4	20.34	14.79	14.4967	5.84333	0.0174173
	LO2-5	19.97	13.88		5.47333	0.0225093
	LO2-6	20.66	14.82		6.16333	0.0139525	0.0179597	1	100
	LO2+1	20.39	15.31	15.3233	5.06667	0.0298388
	LO2+2	20.29	15.27		4.96667	0.0319804
	LO2+3	20.48	15.39		5.15667	0.0280342	0.0299512	1.66769	166.769
3	group	RRM2	actin	average of actin	ΔC(β-actin)	ΔΔCt	average	Normalized	%
	LO2-5	23.09	14.17	14.3167	8.77333	0.00228541
	LO2-5	22	14.32		7.68333	0.00486504
	LO2-5	22.34	14.46		8.02333	0.00384358	0.00366468	1	100
	LO2+1	23.1	15.52	15.4967	7.60333	0.00514243
	LO2+1	22.53	15.38		7.03333	0.00763406
	LO2+1	22.26	15.59		6.76333	0.00920521	0.00732724	1.99942	199.942
